# Supplementary material for: Tuneable light-emitting carbon-dot/polymer flexible films prepared through one-pot synthesis
Source: Royal Society of Chemistry journal article supplement (doi:10.1039/c5nr08400h), 2016-01-01
Supplement: c5nr08400h1.pdf [file c5nr08400h1.pdf]

## Supporting Information

### Tunable light-emitting carbon-dot/polymer flexible films prepared through one-pot synthesis

Susanta Kumar Bhunia,<sup>a</sup> Sukhendu Nandi,<sup>a</sup> Rafi Shikler<sup>b</sup> and Raz Jelinek<sup>a,c</sup>

a. Department of Chemistry, Ben Gurion University of the Negev, Beer Sheva 84105, Israel.

E-mail: [razj@bgu.ac.il](mailto:razj@bgu.ac.il)

b. Department of Electrical and Computer Engineering, Ben Gurion University the Negev, Beer Sheva 84105, Israel

c. Ise Katz Institute for Nanotechnology, Ben Gurion University of the Negev, Beer Sheva 84105, Israel

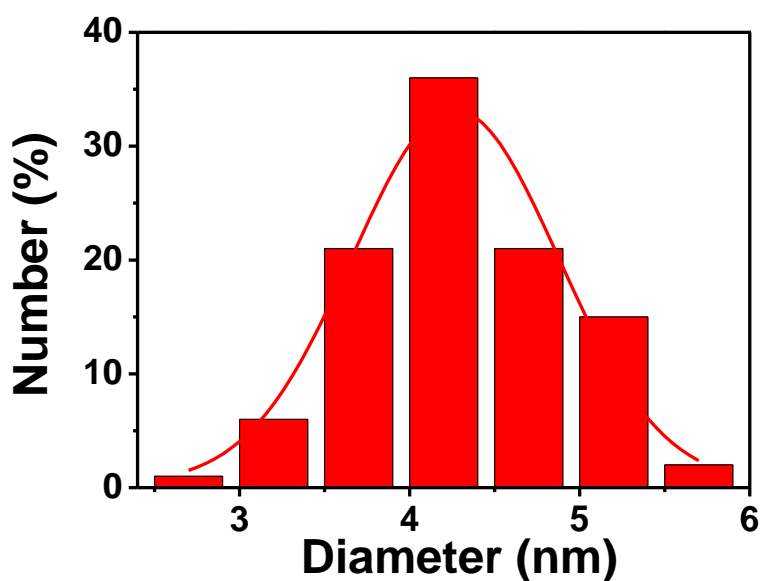

**Figure S1:** Size distribution of green C-dots extracted from the TEM experiment. Average size of  $4.2 \pm 0.6$  nm.

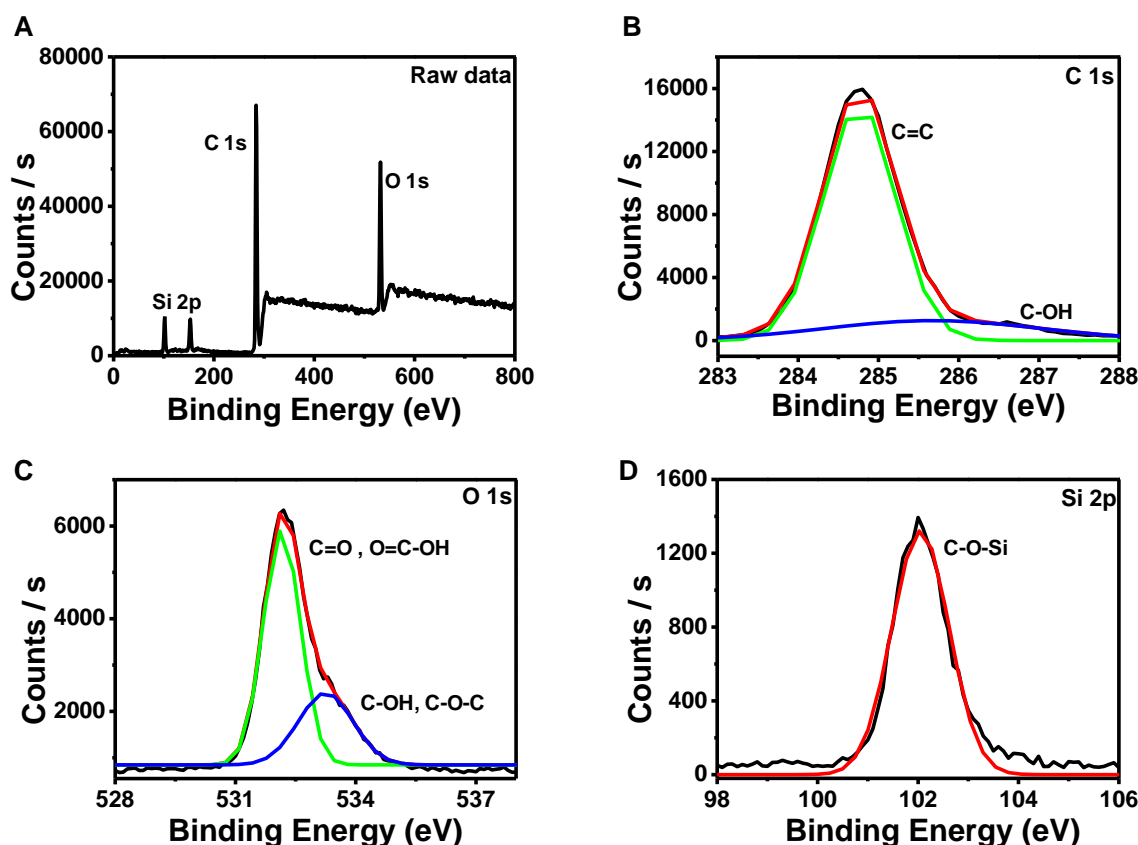

**Figure S2:** X-ray photoelectron spectroscopy (XPS) of C-dots/PDMS. (A) XPS raw data of yellow C-dots embedded in PDMS matrix showing the signature peaks of carbon and oxygen as well as silicon from the PDMS matrix. (B) Deconvoluted C 1s spectrum, displaying a peak at  $\sim 284.7$  eV corresponding to  $sp^2$  carbon atoms (C=C) and a peak at  $\sim 286.0$  eV assigned to C-OH groups. (C) Deconvoluted O 1s spectrum displaying a peak at  $\sim 532.0$  eV for C=O and O=C-OH groups, and a peak at  $\sim 533.2$  eV for C-OH and/or C-O-C groups. (D) The peak at  $\sim 102.0$  eV of Si 2p represents the C-O-Si units of the PDMS matrix. XPS experiments were performed on an X-ray photoelectron spectrometer ESCALAB 250 ultrahigh vacuum ( $1 \times 10^{-9}$  bar) apparatus with an  $AlK\alpha$  X-ray source and a monochromator. The X-ray beam size was  $500 \mu m$  and survey spectra were recorded with pass energy (PE) 150eV and high energy resolution spectra were recorded with pass energy (PE) 20eV. Processing of the XPS results was carried out using AVANTGE program.

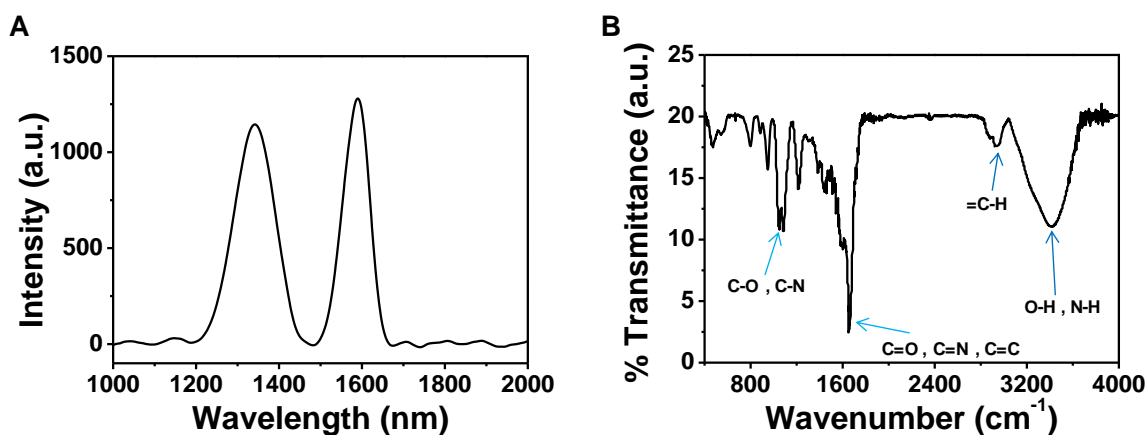

**Figure S3:** Spectroscopic characterization of C-dot/PDMS films. (A) Raman spectrum showing the D and G bands at  $\sim 1340$  and  $\sim 1590$   $cm^{-1}$ , respectively, with  $I_G/I_D$  ratio of  $\sim 1.12$ , indicating the presence of more graphitic carbon than defect states. Raman spectrum was recorded with a Jobin-Yvon LabRam HR 800 micro-Raman system equipped with a Synapse CCD detector by 488 nm Argon laser excitation source. (B) Fourier transform infrared (FTIR) spectrum of orange C-dot/PDMS films (precursor 3) showing different functional groups. The peak at  $\sim 3400$   $cm^{-1}$  corresponds to N-H/O-H stretching, the peak at  $\sim 2925$   $cm^{-1}$  is ascribed to =C-H (methylene), peak at  $\sim 1650$   $cm^{-1}$  for C=O, C=N and C=C bonds. The

peak at  $\sim 1045\text{ cm}^{-1}$  corresponds to the C-O, C-N bonds. FTIR spectroscopy was performed on a NICOLET 6700 FTIR spectrometer.

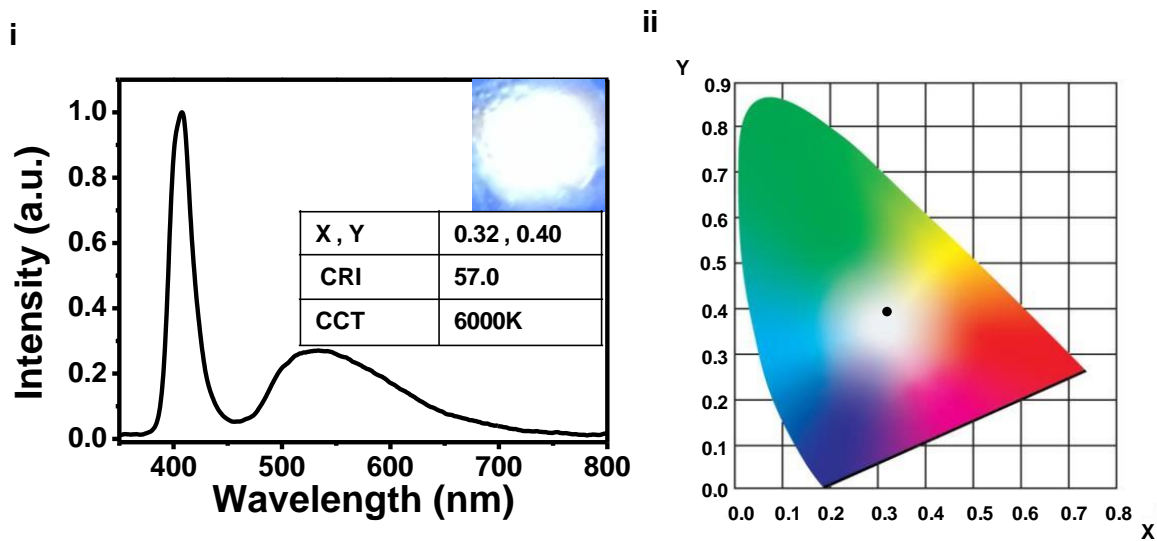

**Figure S4:** Cool white light generated in C-dot/PDMS film. (i) Emission spectrum of C-dot/PDMS film (prepared by using precursor 1) recorded upon excitation with a blue-LED (403 nm). (ii) CIE diagram showing the coordinated corresponding to the blue LED-illuminated C-dot/PDMS film.
